# Supplementary material for: Latitudinal Variation in Circadian Rhythmicity in Nasonia vitripennis
Source: PubMed Central journal article supplement (PMC6912635; doi:10.3390/bs9110115), 2019-11-15
Supplement: behavsci-09-00115-s001.pdf [file behavsci-09-00115-s001.pdf]

## Supplementary Information

**Table S1.** Timing of onset, peak and offset of activity for Corsica (45°N) (S1, S2, S3, S4, S5) and Oulu (65°N) (N1, N2, N3, N4, N5) wasps under long (LD16:08) and short (LD08:16) day conditions and free running rhythm ( $\tau$ ) under constant condition (DD). ZT (h) is zeitgeber time in hours. Different letters indicate significant differences ( $P < 0.05$ , ANOVA with a Tukey's post hoc multiple-comparisons test).

| Lines            | LD16:08                         |                                 |                                  | LD08:16                          |                                 |                                  | DD                               |             |
|------------------|---------------------------------|---------------------------------|----------------------------------|----------------------------------|---------------------------------|----------------------------------|----------------------------------|-------------|
|                  | Onset $\pm$ SE                  | Peak $\pm$ SE                   | Offset $\pm$ SE                  | Onset $\pm$ SE                   | Peak $\pm$ SE                   | Offset $\pm$ SE                  | $\tau \pm$ SE                    | Arrhythmic  |
|                  | ZT                              | ZT                              | ZT                               | ZT                               | ZT                              | ZT                               | h                                | %           |
| N1               | 3.1 $\pm$ 0.3                   | 10.8 $\pm$ 0.3                  | 18.7 $\pm$ 0.6                   | 0.1 $\pm$ 0.1                    | 4.5 $\pm$ 0.3                   | 11.6 $\pm$ 0.4                   | 26.9 $\pm$ 0.1                   | 19.4        |
|                  | (a)                             | (a)                             | (a)                              | (a)                              | (a)                             | (ab)                             | (a)                              |             |
| N2               | 1.7 $\pm$ 0.4                   | 8.2 $\pm$ 0.4                   | 16.2 $\pm$ 0.3                   | 23.9 $\pm$ 0.2                   | 4.51 $\pm$ 0.2                  | 11.92 $\pm$ 0.38                 | 26.7 $\pm$ 0.1                   | 55.2        |
|                  | (ab)                            | (b)                             | (b)                              | (a)                              | (a)                             | (b)                              | (a)                              |             |
| N3               | 2.29 $\pm$ 0.42                 | 7.2 $\pm$ 0.2                   | 17.9 $\pm$ 0.2                   | 22.7 $\pm$ 0.3                   | 3.15 $\pm$ 0.2                  | 10.6 $\pm$ 0.3                   | 26.57 $\pm$ 0.17                 | 36.7        |
|                  | (b)                             | (bc)                            | (bc)                             | (ab)                             | (b)                             | (a)                              | (a)                              |             |
| N4               | 1.3 $\pm$ 0.2                   | 6.7 $\pm$ 0.3                   | 14.3 $\pm$ 0.3                   | 22.6 $\pm$ 0.3                   | 3.12 $\pm$ 0.2                  | 10.7 $\pm$ 0.4                   | 26.47 $\pm$ 0.25                 | 40.7        |
|                  | (bc)                            | (bcd)                           | (c)                              | (ab)                             | (b)                             | (a)                              | (a)                              |             |
| N5               | 1.3 $\pm$ 0.5                   | 6.4 $\pm$ 0.7                   | 14.6 $\pm$ 0.6                   | 22.9 $\pm$ 0.2                   | 2.8 $\pm$ 0.2                   | 8.7 $\pm$ 0.4                    | 26.7 $\pm$ 0.1                   | 41.7        |
|                  | (bc)                            | (cd)                            | (bc)                             | (ab)                             | (b)                             | (c)                              | (a)                              |             |
| <b>Overall N</b> | <b>2.0 <math>\pm</math> 0.2</b> | <b>7.9 <math>\pm</math> 0.2</b> | <b>16.1 <math>\pm</math> 0.2</b> | <b>23.4 <math>\pm</math> 0.2</b> | <b>3.5 <math>\pm</math> 0.1</b> | <b>10.5 <math>\pm</math> 0.2</b> | <b>26.8 <math>\pm</math> 0.1</b> | <b>43.5</b> |
| S1               | 1.1 $\pm$ 0.4                   | 6.4 $\pm$ 0.4                   | 12.7 $\pm$ 0.4                   | 21.7 $\pm$ 0.2                   | 2.9 $\pm$ 0.2                   | 8.7 $\pm$ 0.2                    | 23.8 $\pm$ 0.1                   | 27.0        |
|                  | (ab)                            | (cd)                            | (c)                              | (bc)                             | (b)                             | (c)                              | (b)                              |             |
| S2               | 0.1 $\pm$ 0.1                   | 5.3 $\pm$ 0.2                   | 13.1 $\pm$ 0.2                   | 22.3 $\pm$ 0.2                   | 3.0 $\pm$ 0.3                   | 8.6 $\pm$ 0.1                    | 24.7 $\pm$ 0.2                   | 17.0        |
|                  | (c)                             | (d)                             | (c)                              | (bc)                             | (b)                             | (c)                              | (c)                              |             |
| S3               | 23.8 $\pm$ 0.2                  | 5.8 $\pm$ 0.3                   | 14.2 $\pm$ 0.3                   | 21.1 $\pm$ 0.2                   | 1.5 $\pm$ 0.2                   | 7.5 $\pm$ 0.3                    | 24.4 $\pm$ 0.4                   | 51.0        |
|                  | (c)                             | (cd)                            | (c)                              | (c)                              | (c)                             | (c)                              |                                  |             |
| S4               | 23.9 $\pm$ 0.3                  | 5.4 $\pm$ 0.4                   | 13.1 $\pm$ 0.4                   | 21.9 $\pm$ 0.3                   | 3.2 $\pm$ 0.3                   | 9.0 $\pm$ 0.2                    | -                                | 100         |
|                  | (c)                             | (d)                             | (c)                              | (bc)                             | (b)                             | (c)                              | (b)                              |             |
| S5               | 23.7 $\pm$ 0.2                  | 3.6 $\pm$ 0.2                   | 13.2 $\pm$ 0.3                   | 21.1 $\pm$ 0.2                   | 0.9 $\pm$ 0.1                   | 7.8 $\pm$ 0.1                    | 24.3 $\pm$ 0.1                   | 22.6        |
|                  | (c)                             | (e)                             | (c)                              | (c)                              | (c)                             | (c)                              | (b)                              |             |
| <b>Overall S</b> | <b>0.1 <math>\pm</math> 0.1</b> | <b>5.3 <math>\pm</math> 0.2</b> | <b>13.2 <math>\pm</math> 0.2</b> | <b>21.6 <math>\pm</math> 0.1</b> | <b>2.3 <math>\pm</math> 0.1</b> | <b>8.3 <math>\pm</math> 0.1</b>  | <b>24.3 <math>\pm</math> 0.1</b> | <b>38.7</b> |
